# Supplementary material for: Translatomic database of cortical astroglia across male and female mouse development reveals two distinct developmental phenotypes
Source: bioRxiv or medRxiv preprint supplement (doi:10.1101/681684), 2020-09-26
Supplement: Supplementary file [file media-1.pdf]

# Supplemental Figure 1

## Animal numbers for immunohistochemistry

| Age/Sex | P1* | P4 | P7 | P14 | P35 | Adult |
|---------|-----|----|----|-----|-----|-------|
| M       | 5   | 5  | 3  | 5   | 4   | 5     |
| F       | 4   | 4  | 4  | 5   | 5   | 5     |
| Total   | 9   | 9  | 7  | 10  | 9   | 10    |

## Animal numbers for TRAPseq

| Age/Sex | P1* | P4 | P7 | P14 | P35 | Adult |
|---------|-----|----|----|-----|-----|-------|
| M       | 5   | 4  | 2  | 5   | 4   | 5     |
| F       | 4   | 4  | 6  | 5   | 3   | 4     |
| Total   | 9   | 8  | 8  | 10  | 7   | 9     |

## Animal numbers for organizational hormones study

| Sex/Group | Vehicle | Estradiol/Letrozole |
|-----------|---------|---------------------|
| Male      | 7       | 7                   |
| Female    | 8       | 9                   |

## Antibodies used for immunohistochemistry

| Antibody            | Supplier               | Species | Dilution |
|---------------------|------------------------|---------|----------|
| anti-GFP            | Abcam (ab19370)        | Chicken | 1:1000   |
| anti-GFAP           | Abcam (ab134436)       | Chicken | 1:500    |
| anti-GFAP           | Abcam (ab10062)        | Mouse   | 1:1000   |
| anti-GFAP           | Sigma (AB5804)         | Rabbit  | 1:500    |
| anti-GS             | Abcam (ab73593)        | Mouse   | 1:500    |
| anti-Ki67           | Invitrogen (PA1-21520) | Rabbit  | 1:500    |
| anti-Vimentin       | Invitrogen (PA5-27231) | Rabbit  | 1:500    |
| Donkey anti-chicken | Alexafluor 488         |         | 1:1000   |
| Donkey anti-mouse   | Alexafluor 488         |         | 1:1000   |
| Donkey anti-rabbit  | Alexafluor 546         |         | 1:500    |
| Donkey anti-mouse   | Alexafluor 546         |         | 1:500    |

Bottom- Principal component analysis plots. Represented are the sample distribution along the first principal component (PC1) and then second principal component (PC2). Shows in brackets as the percentage of the variance captured by PC1 and PC2. Circles: female samples; squares: male samples. Symbols are color coded by age.
